# Supplementary material for: Ideal vs. real: a systematic review on handling covariates in randomized controlled trials
Source: Springer Nature journal article supplement (doi:10.1186/s12874-019-0787-8), 2019-07-03
Supplement: MOESM1 [file 16879084]

# Allocation Techniques Review

## Data Dictionary Codebook

10/04/2016 2:05pm

| #                         | Variable / Field Name                                                      | Field Label<br><i>Field Note</i>              | Field Attributes (Field Type, Validation, Choices, Calculations, etc.)                                                                                                                                                                         |   |            |   |              |   |           |   |            |    |                 |
|---------------------------|----------------------------------------------------------------------------|-----------------------------------------------|------------------------------------------------------------------------------------------------------------------------------------------------------------------------------------------------------------------------------------------------|---|------------|---|--------------|---|-----------|---|------------|----|-----------------|
| Instrument: <b>Screen</b> |                                                                            |                                               |                                                                                                                                                                                                                                                |   |            |   |              |   |           |   |            |    |                 |
| 1                         | pmid                                                                       | PubMed ID:                                    | text                                                                                                                                                                                                                                           |   |            |   |              |   |           |   |            |    |                 |
| 2                         | author                                                                     | First Author:                                 | text                                                                                                                                                                                                                                           |   |            |   |              |   |           |   |            |    |                 |
| 3                         | review_yes                                                                 | Include article in review?                    | yesno<br><table border="1"> <tr><td>1</td><td>Yes</td></tr> <tr><td>0</td><td>No</td></tr> </table>                                                                                                                                            | 1 | Yes        | 0 | No           |   |           |   |            |    |                 |
| 1                         | Yes                                                                        |                                               |                                                                                                                                                                                                                                                |   |            |   |              |   |           |   |            |    |                 |
| 0                         | No                                                                         |                                               |                                                                                                                                                                                                                                                |   |            |   |              |   |           |   |            |    |                 |
| 4                         | exclude_reason<br>Show the field ONLY if:<br>[review_yes] = '0'            | Why was the article excluded?                 | radio<br><table border="1"> <tr><td>1</td><td>Not an RCT</td></tr> <tr><td>2</td><td>Review paper</td></tr> <tr><td>3</td><td>Editorial</td></tr> <tr><td>4</td><td>Commentary</td></tr> <tr><td>88</td><td>Other (specify)</td></tr> </table> | 1 | Not an RCT | 2 | Review paper | 3 | Editorial | 4 | Commentary | 88 | Other (specify) |
| 1                         | Not an RCT                                                                 |                                               |                                                                                                                                                                                                                                                |   |            |   |              |   |           |   |            |    |                 |
| 2                         | Review paper                                                               |                                               |                                                                                                                                                                                                                                                |   |            |   |              |   |           |   |            |    |                 |
| 3                         | Editorial                                                                  |                                               |                                                                                                                                                                                                                                                |   |            |   |              |   |           |   |            |    |                 |
| 4                         | Commentary                                                                 |                                               |                                                                                                                                                                                                                                                |   |            |   |              |   |           |   |            |    |                 |
| 88                        | Other (specify)                                                            |                                               |                                                                                                                                                                                                                                                |   |            |   |              |   |           |   |            |    |                 |
| 5                         | exclude_reason_other<br>Show the field ONLY if:<br>[exclude_reason] = '88' | Other (specify)                               | text                                                                                                                                                                                                                                           |   |            |   |              |   |           |   |            |    |                 |
| 6                         | printed                                                                    | Printed outside of inclusion timeframe?       | yesno<br><table border="1"> <tr><td>1</td><td>Yes</td></tr> <tr><td>0</td><td>No</td></tr> </table>                                                                                                                                            | 1 | Yes        | 0 | No           |   |           |   |            |    |                 |
| 1                         | Yes                                                                        |                                               |                                                                                                                                                                                                                                                |   |            |   |              |   |           |   |            |    |                 |
| 0                         | No                                                                         |                                               |                                                                                                                                                                                                                                                |   |            |   |              |   |           |   |            |    |                 |
| 7                         | printed_year<br>Show the field ONLY if:<br>[printed] = '1'                 | What year was the article originally printed? | text (number)                                                                                                                                                                                                                                  |   |            |   |              |   |           |   |            |    |                 |
| 8                         | screen_complete                                                            | Complete?                                     | dropdown<br><table border="1"> <tr><td>0</td><td>Incomplete</td></tr> <tr><td>1</td><td>Unverified</td></tr> <tr><td>2</td><td>Complete</td></tr> </table>                                                                                     | 0 | Incomplete | 1 | Unverified   | 2 | Complete  |   |            |    |                 |
| 0                         | Incomplete                                                                 |                                               |                                                                                                                                                                                                                                                |   |            |   |              |   |           |   |            |    |                 |
| 1                         | Unverified                                                                 |                                               |                                                                                                                                                                                                                                                |   |            |   |              |   |           |   |            |    |                 |
| 2                         | Complete                                                                   |                                               |                                                                                                                                                                                                                                                |   |            |   |              |   |           |   |            |    |                 |
| Instrument: <b>Review</b> |                                                                            |                                               |                                                                                                                                                                                                                                                |   |            |   |              |   |           |   |            |    |                 |
| 9                         | title                                                                      | Title:                                        | text                                                                                                                                                                                                                                           |   |            |   |              |   |           |   |            |    |                 |
| 10                        | journal                                                                    | Journal:                                      | radio<br><table border="1"> <tr><td>0</td><td>NEJM</td></tr> <tr><td>1</td><td>JAMA</td></tr> <tr><td>2</td><td>BMJ</td></tr> <tr><td>3</td><td>Lancet</td></tr> </table>                                                                      | 0 | NEJM       | 1 | JAMA         | 2 | BMJ       | 3 | Lancet     |    |                 |
| 0                         | NEJM                                                                       |                                               |                                                                                                                                                                                                                                                |   |            |   |              |   |           |   |            |    |                 |
| 1                         | JAMA                                                                       |                                               |                                                                                                                                                                                                                                                |   |            |   |              |   |           |   |            |    |                 |
| 2                         | BMJ                                                                        |                                               |                                                                                                                                                                                                                                                |   |            |   |              |   |           |   |            |    |                 |
| 3                         | Lancet                                                                     |                                               |                                                                                                                                                                                                                                                |   |            |   |              |   |           |   |            |    |                 |
| 11                        | year_pub                                                                   | Publication year:                             | text (number, Min: 2000, Max: 2015)                                                                                                                                                                                                            |   |            |   |              |   |           |   |            |    |                 |
| 12                        | size                                                                       | Number of participants randomized             | text (number)                                                                                                                                                                                                                                  |   |            |   |              |   |           |   |            |    |                 |

|    |                             |                                                                        |                                                                                                                                      |                                                                                                                                                                                                                                                                                      |   |                             |   |                      |   |             |   |           |    |                 |
|----|-----------------------------|------------------------------------------------------------------------|--------------------------------------------------------------------------------------------------------------------------------------|--------------------------------------------------------------------------------------------------------------------------------------------------------------------------------------------------------------------------------------------------------------------------------------|---|-----------------------------|---|----------------------|---|-------------|---|-----------|----|-----------------|
|    | 13                          | size_analytic                                                          | Analytic sample size:                                                                                                                | text                                                                                                                                                                                                                                                                                 |   |                             |   |                      |   |             |   |           |    |                 |
|    | 14                          | arms                                                                   | Number of arms:                                                                                                                      | text (number, Min: 2, Max: 5)                                                                                                                                                                                                                                                        |   |                             |   |                      |   |             |   |           |    |                 |
|    | 15                          | studytype                                                              | Study type:                                                                                                                          | radio <table border="1"> <tr> <td>1</td> <td>Superiority ("Regular" RCT)</td> </tr> <tr> <td>2</td> <td>Non-inferiority (NI)</td> </tr> <tr> <td>3</td> <td>Equivalence</td> </tr> <tr> <td>4</td> <td>Crossover</td> </tr> <tr> <td>88</td> <td>Other (specify)</td> </tr> </table> | 1 | Superiority ("Regular" RCT) | 2 | Non-inferiority (NI) | 3 | Equivalence | 4 | Crossover | 88 | Other (specify) |
| 1  | Superiority ("Regular" RCT) |                                                                        |                                                                                                                                      |                                                                                                                                                                                                                                                                                      |   |                             |   |                      |   |             |   |           |    |                 |
| 2  | Non-inferiority (NI)        |                                                                        |                                                                                                                                      |                                                                                                                                                                                                                                                                                      |   |                             |   |                      |   |             |   |           |    |                 |
| 3  | Equivalence                 |                                                                        |                                                                                                                                      |                                                                                                                                                                                                                                                                                      |   |                             |   |                      |   |             |   |           |    |                 |
| 4  | Crossover                   |                                                                        |                                                                                                                                      |                                                                                                                                                                                                                                                                                      |   |                             |   |                      |   |             |   |           |    |                 |
| 88 | Other (specify)             |                                                                        |                                                                                                                                      |                                                                                                                                                                                                                                                                                      |   |                             |   |                      |   |             |   |           |    |                 |
|    | 16                          | studytype_other<br>Show the field ONLY if:<br>[studytype] = '88'       | Other (specify):                                                                                                                     | text                                                                                                                                                                                                                                                                                 |   |                             |   |                      |   |             |   |           |    |                 |
|    | 17                          | cluster                                                                | Cluster-randomized?                                                                                                                  | yesno <table border="1"> <tr> <td>1</td> <td>Yes</td> </tr> <tr> <td>0</td> <td>No</td> </tr> </table>                                                                                                                                                                               | 1 | Yes                         | 0 | No                   |   |             |   |           |    |                 |
| 1  | Yes                         |                                                                        |                                                                                                                                      |                                                                                                                                                                                                                                                                                      |   |                             |   |                      |   |             |   |           |    |                 |
| 0  | No                          |                                                                        |                                                                                                                                      |                                                                                                                                                                                                                                                                                      |   |                             |   |                      |   |             |   |           |    |                 |
|    | 18                          | multicenter                                                            | Multicenter study?                                                                                                                   | yesno <table border="1"> <tr> <td>1</td> <td>Yes</td> </tr> <tr> <td>0</td> <td>No</td> </tr> </table>                                                                                                                                                                               | 1 | Yes                         | 0 | No                   |   |             |   |           |    |                 |
| 1  | Yes                         |                                                                        |                                                                                                                                      |                                                                                                                                                                                                                                                                                      |   |                             |   |                      |   |             |   |           |    |                 |
| 0  | No                          |                                                                        |                                                                                                                                      |                                                                                                                                                                                                                                                                                      |   |                             |   |                      |   |             |   |           |    |                 |
|    | 19                          | multicenter_centers<br>Show the field ONLY if:<br>[multicenter] = '1'  | How many centers?                                                                                                                    | text (number, Min: 2)                                                                                                                                                                                                                                                                |   |                             |   |                      |   |             |   |           |    |                 |
|    | 20                          | year_study                                                             | Study start year:                                                                                                                    | text (number)                                                                                                                                                                                                                                                                        |   |                             |   |                      |   |             |   |           |    |                 |
|    | 21                          | length_reported                                                        | Was study length reported?                                                                                                           | yesno <table border="1"> <tr> <td>1</td> <td>Yes</td> </tr> <tr> <td>0</td> <td>No</td> </tr> </table>                                                                                                                                                                               | 1 | Yes                         | 0 | No                   |   |             |   |           |    |                 |
| 1  | Yes                         |                                                                        |                                                                                                                                      |                                                                                                                                                                                                                                                                                      |   |                             |   |                      |   |             |   |           |    |                 |
| 0  | No                          |                                                                        |                                                                                                                                      |                                                                                                                                                                                                                                                                                      |   |                             |   |                      |   |             |   |           |    |                 |
|    | 22                          | length<br>Show the field ONLY if:<br>[length_reported] = '1'           | Study length:<br><i>Please indicate units of time (e.g. days, weeks, years).</i>                                                     | text                                                                                                                                                                                                                                                                                 |   |                             |   |                      |   |             |   |           |    |                 |
|    | 23                          | length_units<br>Show the field ONLY if:<br>[length_reported] = '1'     | Study length units:                                                                                                                  | radio <table border="1"> <tr> <td>1</td> <td>Days</td> </tr> <tr> <td>2</td> <td>Weeks</td> </tr> <tr> <td>3</td> <td>Months</td> </tr> <tr> <td>4</td> <td>Years</td> </tr> <tr> <td>88</td> <td>Other (specify)</td> </tr> </table>                                                | 1 | Days                        | 2 | Weeks                | 3 | Months      | 4 | Years     | 88 | Other (specify) |
| 1  | Days                        |                                                                        |                                                                                                                                      |                                                                                                                                                                                                                                                                                      |   |                             |   |                      |   |             |   |           |    |                 |
| 2  | Weeks                       |                                                                        |                                                                                                                                      |                                                                                                                                                                                                                                                                                      |   |                             |   |                      |   |             |   |           |    |                 |
| 3  | Months                      |                                                                        |                                                                                                                                      |                                                                                                                                                                                                                                                                                      |   |                             |   |                      |   |             |   |           |    |                 |
| 4  | Years                       |                                                                        |                                                                                                                                      |                                                                                                                                                                                                                                                                                      |   |                             |   |                      |   |             |   |           |    |                 |
| 88 | Other (specify)             |                                                                        |                                                                                                                                      |                                                                                                                                                                                                                                                                                      |   |                             |   |                      |   |             |   |           |    |                 |
|    | 24                          | length_units_other<br>Show the field ONLY if:<br>[length_units] = '88' | Other (specify):                                                                                                                     | text                                                                                                                                                                                                                                                                                 |   |                             |   |                      |   |             |   |           |    |                 |
|    | 25                          | followup_reported                                                      | Was participant follow-up time reported?                                                                                             | yesno <table border="1"> <tr> <td>1</td> <td>Yes</td> </tr> <tr> <td>0</td> <td>No</td> </tr> </table>                                                                                                                                                                               | 1 | Yes                         | 0 | No                   |   |             |   |           |    |                 |
| 1  | Yes                         |                                                                        |                                                                                                                                      |                                                                                                                                                                                                                                                                                      |   |                             |   |                      |   |             |   |           |    |                 |
| 0  | No                          |                                                                        |                                                                                                                                      |                                                                                                                                                                                                                                                                                      |   |                             |   |                      |   |             |   |           |    |                 |
|    | 26                          | followup<br>Show the field ONLY if:<br>[followup_reported] = '1'       | Participant follow-up time:<br><i>If survival analysis, use the median follow-up time. Round to the nearest whole number. Please</i> | text (number, Min: 0)                                                                                                                                                                                                                                                                |   |                             |   |                      |   |             |   |           |    |                 |

|    |                                                                       |                                                                                                     | <i>indicate units of time (e.g. days, weeks, years) below.</i> |                                                                                                                                                                                                                                                                                                                                                                                                                                                                                                                                          |   |                          |   |                                    |   |                                |   |            |    |                    |   |                                        |   |                          |   |                     |    |                 |
|----|-----------------------------------------------------------------------|-----------------------------------------------------------------------------------------------------|----------------------------------------------------------------|------------------------------------------------------------------------------------------------------------------------------------------------------------------------------------------------------------------------------------------------------------------------------------------------------------------------------------------------------------------------------------------------------------------------------------------------------------------------------------------------------------------------------------------|---|--------------------------|---|------------------------------------|---|--------------------------------|---|------------|----|--------------------|---|----------------------------------------|---|--------------------------|---|---------------------|----|-----------------|
| 27 | followup_units<br>Show the field ONLY if: [followup_reported] = '1'   | Participant follow-up units:                                                                        |                                                                | radio<br><table border="1"> <tr><td>1</td><td>Days</td></tr> <tr><td>2</td><td>Weeks</td></tr> <tr><td>3</td><td>Months</td></tr> <tr><td>4</td><td>Years</td></tr> <tr><td>88</td><td>Other (specify)</td></tr> </table>                                                                                                                                                                                                                                                                                                                | 1 | Days                     | 2 | Weeks                              | 3 | Months                         | 4 | Years      | 88 | Other (specify)    |   |                                        |   |                          |   |                     |    |                 |
| 1  | Days                                                                  |                                                                                                     |                                                                |                                                                                                                                                                                                                                                                                                                                                                                                                                                                                                                                          |   |                          |   |                                    |   |                                |   |            |    |                    |   |                                        |   |                          |   |                     |    |                 |
| 2  | Weeks                                                                 |                                                                                                     |                                                                |                                                                                                                                                                                                                                                                                                                                                                                                                                                                                                                                          |   |                          |   |                                    |   |                                |   |            |    |                    |   |                                        |   |                          |   |                     |    |                 |
| 3  | Months                                                                |                                                                                                     |                                                                |                                                                                                                                                                                                                                                                                                                                                                                                                                                                                                                                          |   |                          |   |                                    |   |                                |   |            |    |                    |   |                                        |   |                          |   |                     |    |                 |
| 4  | Years                                                                 |                                                                                                     |                                                                |                                                                                                                                                                                                                                                                                                                                                                                                                                                                                                                                          |   |                          |   |                                    |   |                                |   |            |    |                    |   |                                        |   |                          |   |                     |    |                 |
| 88 | Other (specify)                                                       |                                                                                                     |                                                                |                                                                                                                                                                                                                                                                                                                                                                                                                                                                                                                                          |   |                          |   |                                    |   |                                |   |            |    |                    |   |                                        |   |                          |   |                     |    |                 |
| 28 | units_other<br>Show the field ONLY if: [followup_units] = '88'        | Other (specify):                                                                                    |                                                                | text                                                                                                                                                                                                                                                                                                                                                                                                                                                                                                                                     |   |                          |   |                                    |   |                                |   |            |    |                    |   |                                        |   |                          |   |                     |    |                 |
| 29 | random_title                                                          | Randomized in title:                                                                                |                                                                | yesno, Required<br><table border="1"> <tr><td>1</td><td>Yes</td></tr> <tr><td>0</td><td>No</td></tr> </table>                                                                                                                                                                                                                                                                                                                                                                                                                            | 1 | Yes                      | 0 | No                                 |   |                                |   |            |    |                    |   |                                        |   |                          |   |                     |    |                 |
| 1  | Yes                                                                   |                                                                                                     |                                                                |                                                                                                                                                                                                                                                                                                                                                                                                                                                                                                                                          |   |                          |   |                                    |   |                                |   |            |    |                    |   |                                        |   |                          |   |                     |    |                 |
| 0  | No                                                                    |                                                                                                     |                                                                |                                                                                                                                                                                                                                                                                                                                                                                                                                                                                                                                          |   |                          |   |                                    |   |                                |   |            |    |                    |   |                                        |   |                          |   |                     |    |                 |
| 30 | random_scheme                                                         | Randomization scheme used:                                                                          |                                                                | radio, Required<br><table border="1"> <tr><td>1</td><td>Purely random allocation</td></tr> <tr><td>2</td><td>Blocked (Permuted or Random block)</td></tr> <tr><td>3</td><td>Stratified or Stratified block</td></tr> <tr><td>4</td><td>Urn design</td></tr> <tr><td>5</td><td>Biased coin design</td></tr> <tr><td>6</td><td>Minimization/Covariate adaptive method</td></tr> <tr><td>7</td><td>Response adaptive method</td></tr> <tr><td>9</td><td>Unable to determine</td></tr> <tr><td>88</td><td>Other (specify)</td></tr> </table> | 1 | Purely random allocation | 2 | Blocked (Permuted or Random block) | 3 | Stratified or Stratified block | 4 | Urn design | 5  | Biased coin design | 6 | Minimization/Covariate adaptive method | 7 | Response adaptive method | 9 | Unable to determine | 88 | Other (specify) |
| 1  | Purely random allocation                                              |                                                                                                     |                                                                |                                                                                                                                                                                                                                                                                                                                                                                                                                                                                                                                          |   |                          |   |                                    |   |                                |   |            |    |                    |   |                                        |   |                          |   |                     |    |                 |
| 2  | Blocked (Permuted or Random block)                                    |                                                                                                     |                                                                |                                                                                                                                                                                                                                                                                                                                                                                                                                                                                                                                          |   |                          |   |                                    |   |                                |   |            |    |                    |   |                                        |   |                          |   |                     |    |                 |
| 3  | Stratified or Stratified block                                        |                                                                                                     |                                                                |                                                                                                                                                                                                                                                                                                                                                                                                                                                                                                                                          |   |                          |   |                                    |   |                                |   |            |    |                    |   |                                        |   |                          |   |                     |    |                 |
| 4  | Urn design                                                            |                                                                                                     |                                                                |                                                                                                                                                                                                                                                                                                                                                                                                                                                                                                                                          |   |                          |   |                                    |   |                                |   |            |    |                    |   |                                        |   |                          |   |                     |    |                 |
| 5  | Biased coin design                                                    |                                                                                                     |                                                                |                                                                                                                                                                                                                                                                                                                                                                                                                                                                                                                                          |   |                          |   |                                    |   |                                |   |            |    |                    |   |                                        |   |                          |   |                     |    |                 |
| 6  | Minimization/Covariate adaptive method                                |                                                                                                     |                                                                |                                                                                                                                                                                                                                                                                                                                                                                                                                                                                                                                          |   |                          |   |                                    |   |                                |   |            |    |                    |   |                                        |   |                          |   |                     |    |                 |
| 7  | Response adaptive method                                              |                                                                                                     |                                                                |                                                                                                                                                                                                                                                                                                                                                                                                                                                                                                                                          |   |                          |   |                                    |   |                                |   |            |    |                    |   |                                        |   |                          |   |                     |    |                 |
| 9  | Unable to determine                                                   |                                                                                                     |                                                                |                                                                                                                                                                                                                                                                                                                                                                                                                                                                                                                                          |   |                          |   |                                    |   |                                |   |            |    |                    |   |                                        |   |                          |   |                     |    |                 |
| 88 | Other (specify)                                                       |                                                                                                     |                                                                |                                                                                                                                                                                                                                                                                                                                                                                                                                                                                                                                          |   |                          |   |                                    |   |                                |   |            |    |                    |   |                                        |   |                          |   |                     |    |                 |
| 31 | random_scheme_other<br>Show the field ONLY if: [random_scheme] = '88' | Other (specify):                                                                                    |                                                                | text                                                                                                                                                                                                                                                                                                                                                                                                                                                                                                                                     |   |                          |   |                                    |   |                                |   |            |    |                    |   |                                        |   |                          |   |                     |    |                 |
| 32 | random_covariates                                                     | Were covariates involved in randomization?                                                          |                                                                | radio, Required<br><table border="1"> <tr><td>1</td><td>Yes</td></tr> <tr><td>0</td><td>No</td></tr> <tr><td>9</td><td>Unable to determine</td></tr> </table>                                                                                                                                                                                                                                                                                                                                                                            | 1 | Yes                      | 0 | No                                 | 9 | Unable to determine            |   |            |    |                    |   |                                        |   |                          |   |                     |    |                 |
| 1  | Yes                                                                   |                                                                                                     |                                                                |                                                                                                                                                                                                                                                                                                                                                                                                                                                                                                                                          |   |                          |   |                                    |   |                                |   |            |    |                    |   |                                        |   |                          |   |                     |    |                 |
| 0  | No                                                                    |                                                                                                     |                                                                |                                                                                                                                                                                                                                                                                                                                                                                                                                                                                                                                          |   |                          |   |                                    |   |                                |   |            |    |                    |   |                                        |   |                          |   |                     |    |                 |
| 9  | Unable to determine                                                   |                                                                                                     |                                                                |                                                                                                                                                                                                                                                                                                                                                                                                                                                                                                                                          |   |                          |   |                                    |   |                                |   |            |    |                    |   |                                        |   |                          |   |                     |    |                 |
| 33 | covariate_number<br>Show the field ONLY if: [random_covariates] = '1' | How many covariates were involved in randomization?<br><i>Include "site" or "center" if listed.</i> |                                                                | text (integer, Min: 1)                                                                                                                                                                                                                                                                                                                                                                                                                                                                                                                   |   |                          |   |                                    |   |                                |   |            |    |                    |   |                                        |   |                          |   |                     |    |                 |
| 34 | random_clear                                                          | In your opinion, was the reporting on randomization CLEAR?                                          |                                                                | yesno<br><table border="1"> <tr><td>1</td><td>Yes</td></tr> <tr><td>0</td><td>No</td></tr> </table>                                                                                                                                                                                                                                                                                                                                                                                                                                      | 1 | Yes                      | 0 | No                                 |   |                                |   |            |    |                    |   |                                        |   |                          |   |                     |    |                 |
| 1  | Yes                                                                   |                                                                                                     |                                                                |                                                                                                                                                                                                                                                                                                                                                                                                                                                                                                                                          |   |                          |   |                                    |   |                                |   |            |    |                    |   |                                        |   |                          |   |                     |    |                 |
| 0  | No                                                                    |                                                                                                     |                                                                |                                                                                                                                                                                                                                                                                                                                                                                                                                                                                                                                          |   |                          |   |                                    |   |                                |   |            |    |                    |   |                                        |   |                          |   |                     |    |                 |
| 35 | table1                                                                | Did the article include a "Table 1"?                                                                |                                                                | yesno, Required<br><table border="1"> <tr><td>1</td><td>Yes</td></tr> <tr><td>0</td><td>No</td></tr> </table>                                                                                                                                                                                                                                                                                                                                                                                                                            | 1 | Yes                      | 0 | No                                 |   |                                |   |            |    |                    |   |                                        |   |                          |   |                     |    |                 |
| 1  | Yes                                                                   |                                                                                                     |                                                                |                                                                                                                                                                                                                                                                                                                                                                                                                                                                                                                                          |   |                          |   |                                    |   |                                |   |            |    |                    |   |                                        |   |                          |   |                     |    |                 |
| 0  | No                                                                    |                                                                                                     |                                                                |                                                                                                                                                                                                                                                                                                                                                                                                                                                                                                                                          |   |                          |   |                                    |   |                                |   |            |    |                    |   |                                        |   |                          |   |                     |    |                 |

|    |                                     |                                                                                            |                                                     |                                                                                                                                                                                                                                                                                                                                   |   |               |   |                               |   |                                     |   |                     |    |                     |    |                 |
|----|-------------------------------------|--------------------------------------------------------------------------------------------|-----------------------------------------------------|-----------------------------------------------------------------------------------------------------------------------------------------------------------------------------------------------------------------------------------------------------------------------------------------------------------------------------------|---|---------------|---|-------------------------------|---|-------------------------------------|---|---------------------|----|---------------------|----|-----------------|
|    | 36                                  | imbalance_test<br>Show the field ONLY if:<br>[table1] = '1'                                | Baseline test used (see Table 1):                   | yesno, Required<br><table border="1"> <tr> <td>1</td> <td>Yes</td> </tr> <tr> <td>0</td> <td>No</td> </tr> </table>                                                                                                                                                                                                               | 1 | Yes           | 0 | No                            |   |                                     |   |                     |    |                     |    |                 |
| 1  | Yes                                 |                                                                                            |                                                     |                                                                                                                                                                                                                                                                                                                                   |   |               |   |                               |   |                                     |   |                     |    |                     |    |                 |
| 0  | No                                  |                                                                                            |                                                     |                                                                                                                                                                                                                                                                                                                                   |   |               |   |                               |   |                                     |   |                     |    |                     |    |                 |
|    | 37                                  | outcome_type                                                                               | What is the nature of the primary outcome variable? | radio, Required<br><table border="1"> <tr> <td>1</td> <td>Continuous</td> </tr> <tr> <td>2</td> <td>Binary</td> </tr> <tr> <td>3</td> <td>Time-to-event</td> </tr> <tr> <td>4</td> <td>Ordinal/Categorical</td> </tr> <tr> <td>5</td> <td>Unable to determine</td> </tr> <tr> <td>88</td> <td>Other (specify)</td> </tr> </table> | 1 | Continuous    | 2 | Binary                        | 3 | Time-to-event                       | 4 | Ordinal/Categorical | 5  | Unable to determine | 88 | Other (specify) |
| 1  | Continuous                          |                                                                                            |                                                     |                                                                                                                                                                                                                                                                                                                                   |   |               |   |                               |   |                                     |   |                     |    |                     |    |                 |
| 2  | Binary                              |                                                                                            |                                                     |                                                                                                                                                                                                                                                                                                                                   |   |               |   |                               |   |                                     |   |                     |    |                     |    |                 |
| 3  | Time-to-event                       |                                                                                            |                                                     |                                                                                                                                                                                                                                                                                                                                   |   |               |   |                               |   |                                     |   |                     |    |                     |    |                 |
| 4  | Ordinal/Categorical                 |                                                                                            |                                                     |                                                                                                                                                                                                                                                                                                                                   |   |               |   |                               |   |                                     |   |                     |    |                     |    |                 |
| 5  | Unable to determine                 |                                                                                            |                                                     |                                                                                                                                                                                                                                                                                                                                   |   |               |   |                               |   |                                     |   |                     |    |                     |    |                 |
| 88 | Other (specify)                     |                                                                                            |                                                     |                                                                                                                                                                                                                                                                                                                                   |   |               |   |                               |   |                                     |   |                     |    |                     |    |                 |
|    | 38                                  | outcome_type_other<br>Show the field ONLY if:<br>[outcome_type] = '88'                     | Other (specify):                                    | text                                                                                                                                                                                                                                                                                                                              |   |               |   |                               |   |                                     |   |                     |    |                     |    |                 |
|    | 39                                  | imbalance_adj                                                                              | Type of analysis:                                   | radio, Required<br><table border="1"> <tr> <td>0</td> <td>Unadjusted</td> </tr> <tr> <td>1</td> <td>Adjusted</td> </tr> <tr> <td>2</td> <td>Both</td> </tr> <tr> <td>9</td> <td>Unable to determine</td> </tr> </table>                                                                                                           | 0 | Unadjusted    | 1 | Adjusted                      | 2 | Both                                | 9 | Unable to determine |    |                     |    |                 |
| 0  | Unadjusted                          |                                                                                            |                                                     |                                                                                                                                                                                                                                                                                                                                   |   |               |   |                               |   |                                     |   |                     |    |                     |    |                 |
| 1  | Adjusted                            |                                                                                            |                                                     |                                                                                                                                                                                                                                                                                                                                   |   |               |   |                               |   |                                     |   |                     |    |                     |    |                 |
| 2  | Both                                |                                                                                            |                                                     |                                                                                                                                                                                                                                                                                                                                   |   |               |   |                               |   |                                     |   |                     |    |                     |    |                 |
| 9  | Unable to determine                 |                                                                                            |                                                     |                                                                                                                                                                                                                                                                                                                                   |   |               |   |                               |   |                                     |   |                     |    |                     |    |                 |
|    | 40                                  | adj_reason<br>Show the field ONLY if:<br>[imbalance_adj] = '1' or<br>[imbalance_adj] = '2' | Reason for adjustment:                              | radio<br><table border="1"> <tr> <td>1</td> <td>Pre-specified</td> </tr> <tr> <td>2</td> <td>Data driven - Lack of balance</td> </tr> <tr> <td>3</td> <td>Data driven - Potential confounding</td> </tr> <tr> <td>9</td> <td>Unable to determine</td> </tr> <tr> <td>88</td> <td>Other (specify)</td> </tr> </table>              | 1 | Pre-specified | 2 | Data driven - Lack of balance | 3 | Data driven - Potential confounding | 9 | Unable to determine | 88 | Other (specify)     |    |                 |
| 1  | Pre-specified                       |                                                                                            |                                                     |                                                                                                                                                                                                                                                                                                                                   |   |               |   |                               |   |                                     |   |                     |    |                     |    |                 |
| 2  | Data driven - Lack of balance       |                                                                                            |                                                     |                                                                                                                                                                                                                                                                                                                                   |   |               |   |                               |   |                                     |   |                     |    |                     |    |                 |
| 3  | Data driven - Potential confounding |                                                                                            |                                                     |                                                                                                                                                                                                                                                                                                                                   |   |               |   |                               |   |                                     |   |                     |    |                     |    |                 |
| 9  | Unable to determine                 |                                                                                            |                                                     |                                                                                                                                                                                                                                                                                                                                   |   |               |   |                               |   |                                     |   |                     |    |                     |    |                 |
| 88 | Other (specify)                     |                                                                                            |                                                     |                                                                                                                                                                                                                                                                                                                                   |   |               |   |                               |   |                                     |   |                     |    |                     |    |                 |
|    | 41                                  | adj_reason_other<br>Show the field ONLY if:<br>[adj_reason] = '88'                         | Other (specify):                                    | text                                                                                                                                                                                                                                                                                                                              |   |               |   |                               |   |                                     |   |                     |    |                     |    |                 |
|    | 42                                  | comments                                                                                   | Comments:                                           | notes                                                                                                                                                                                                                                                                                                                             |   |               |   |                               |   |                                     |   |                     |    |                     |    |                 |
|    | 43                                  | review_complete                                                                            | Complete?                                           | dropdown<br><table border="1"> <tr> <td>0</td> <td>Incomplete</td> </tr> <tr> <td>1</td> <td>Unverified</td> </tr> <tr> <td>2</td> <td>Complete</td> </tr> </table>                                                                                                                                                               | 0 | Incomplete    | 1 | Unverified                    | 2 | Complete                            |   |                     |    |                     |    |                 |
| 0  | Incomplete                          |                                                                                            |                                                     |                                                                                                                                                                                                                                                                                                                                   |   |               |   |                               |   |                                     |   |                     |    |                     |    |                 |
| 1  | Unverified                          |                                                                                            |                                                     |                                                                                                                                                                                                                                                                                                                                   |   |               |   |                               |   |                                     |   |                     |    |                     |    |                 |
| 2  | Complete                            |                                                                                            |                                                     |                                                                                                                                                                                                                                                                                                                                   |   |               |   |                               |   |                                     |   |                     |    |                     |    |                 |
